# Supplementary material for: Considerations for hypothetical carbon dioxide removal via alkalinity addition in the Amazon River watershed
Source: Copernicus journal article supplement (doi:10.5194/egusphere-2022-1505), 2023-01-05
Supplement: Supplementary file 1 [file egusphere-2022-1505-supplement.pdf]

# Considerations for hypothetical carbon dioxide removal via alkalinity addition in the Amazon River watershed

Linquan Mu, Jaime B. Palter, Hongjie Wang

Graduate School of Oceanography, University of Rhode Island, Narragansett, RI, 02882, USA

5 Correspondence to: Linquan Mu (mulinquan@gmail.com)

## Supplemental Materials

### Supplemental Figure

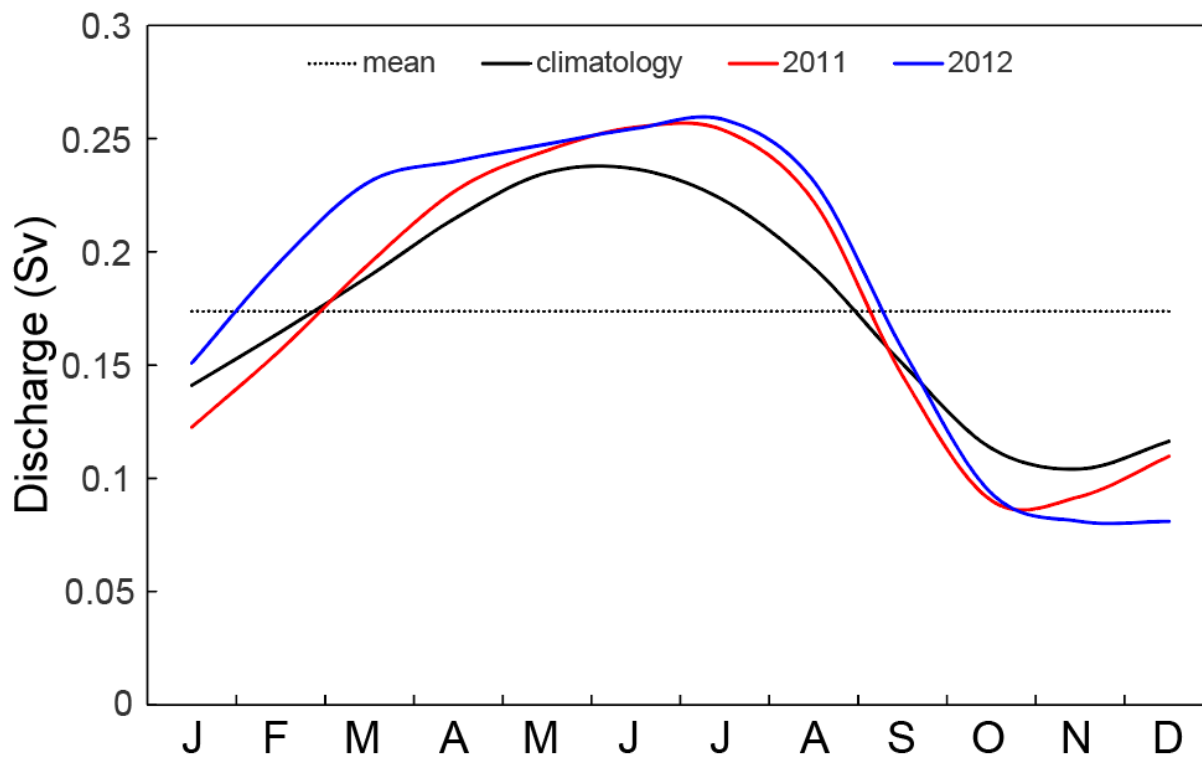

10 **Figure S1.** Monthly discharge of the Amazon River (Sv; 1 Sv = 10<sup>6</sup> m<sup>3</sup> s<sup>-1</sup>) at the Óbidos gauge station (~650 km upriver from the mouth) in 2011 (red line), 2012 (blue line), and climatology averaged over 1968–2012 (black line), in reference to the mean annual discharge 1968–2012 (dotted line).
